# Supplementary material for: Impact of physical distancing measures against COVID-19 on contacts and mixing patterns: repeated cross-sectional surveys, the Netherlands, 2016–17, April 2020 and June 2020
Source: PubMed Central journal article supplement (PMC7908067; doi:10.2807/1560-7917.es.2021.26.8.2000994), 2021-02-25
Supplement: 20-00994_BACKER_Supplement2.pdf [file 20-00994_BACKER_Supplement2.pdf]

This supplementary material is hosted by *Eurosurveillance* as supporting information alongside the article 'Impact of physical distancing measures against COVID-19 on contacts and mixing patterns: repeated cross-sectional surveys, the Netherlands, 2016-17, April 2020 and June 2020', on behalf of the authors, who remain responsible for the accuracy and appropriateness of the content. The same standards for ethics, copyright, attributions and permissions as for the article apply. Supplements are not edited by *Eurosurveillance* and the journal is not responsible for the maintenance of any links or email addresses provided therein.

## S2. Data of contact matrices

| survey   | contact_type | part_age | cont_age | m_est               |
|----------|--------------|----------|----------|---------------------|
| baseline | all          | [0,5)    | [0,5)    | 6.139521635385062   |
| baseline | all          | [0,5)    | [5,10)   | 2.0527165928673994  |
| baseline | all          | [0,5)    | [10,20)  | 1.175997998243935   |
| baseline | all          | [0,5)    | [20,30)  | 1.364982706773537   |
| baseline | all          | [0,5)    | [30,40)  | 2.2240427117384405  |
| baseline | all          | [0,5)    | [40,50)  | 1.5889823150802727  |
| baseline | all          | [0,5)    | [50,60)  | 1.0548466633926246  |
| baseline | all          | [0,5)    | [60,70)  | 0.67532922983989    |
| baseline | all          | [0,5)    | [70,80)  | 0.23854694625315218 |
| baseline | all          | [0,5)    | [80,Inf] | 0.08774812816606976 |
| baseline | all          | [5,10)   | [0,5)    | 1.92697166301877    |
| baseline | all          | [5,10)   | [5,10)   | 10.504839348460953  |
| baseline | all          | [5,10)   | [10,20)  | 3.6045354064172415  |
| baseline | all          | [5,10)   | [20,30)  | 1.9542018293314807  |
| baseline | all          | [5,10)   | [30,40)  | 2.202378931284297   |
| baseline | all          | [5,10)   | [40,50)  | 2.1516106498031857  |
| baseline | all          | [5,10)   | [50,60)  | 1.1610568208259353  |
| baseline | all          | [5,10)   | [60,70)  | 0.6312683395015201  |
| baseline | all          | [5,10)   | [70,80)  | 0.2533635834408248  |
| baseline | all          | [5,10)   | [80,Inf] | 0.06958862088202837 |
| baseline | all          | [10,20)  | [0,5)    | 0.5089127775157799  |
| baseline | all          | [10,20)  | [5,10)   | 1.661601516803311   |
| baseline | all          | [10,20)  | [10,20)  | 11.19323165333237   |
| baseline | all          | [10,20)  | [20,30)  | 2.9661845764299835  |

|          |     |                  |                     |
|----------|-----|------------------|---------------------|
| baseline | all | [10,20) [30,40)  | 1.9023619378235366  |
| baseline | all | [10,20) [40,50)  | 2.487524570869481   |
| baseline | all | [10,20) [50,60)  | 1.6280378588748066  |
| baseline | all | [10,20) [60,70)  | 0.6610149672749319  |
| baseline | all | [10,20) [70,80)  | 0.2583349890120911  |
| baseline | all | [10,20) [80,Inf] | 0.08542946453836944 |
| baseline | all | [20,30) [0,5)    | 0.5521773622197372  |
| baseline | all | [20,30) [5,10)   | 0.8421011091734943  |
| baseline | all | [20,30) [10,20)  | 2.7727429593223625  |
| baseline | all | [20,30) [20,30)  | 5.284430071050166   |
| baseline | all | [20,30) [30,40)  | 2.702265307635128   |
| baseline | all | [20,30) [40,50)  | 2.43894333022775    |
| baseline | all | [20,30) [50,60)  | 2.02359873081602    |
| baseline | all | [20,30) [60,70)  | 0.886689654288011   |
| baseline | all | [20,30) [70,80)  | 0.34632060383679847 |
| baseline | all | [20,30) [80,Inf] | 0.22876797379690542 |
| baseline | all | [30,40) [0,5)    | 0.9462173536707417  |
| baseline | all | [30,40) [5,10)   | 0.9981168126264318  |
| baseline | all | [30,40) [10,20)  | 1.8702521868868922  |
| baseline | all | [30,40) [20,30)  | 2.8419964309002173  |
| baseline | all | [30,40) [30,40)  | 4.143537717960831   |
| baseline | all | [30,40) [40,50)  | 2.9687596984561706  |
| baseline | all | [30,40) [50,60)  | 2.0021661690617973  |
| baseline | all | [30,40) [60,70)  | 1.0386437286892038  |
| baseline | all | [30,40) [70,80)  | 0.42258875215409086 |
| baseline | all | [30,40) [80,Inf] | 0.26275265433434003 |
| baseline | all | [40,50) [0,5)    | 0.5881973964185363  |
| baseline | all | [40,50) [5,10)   | 0.8484156143985718  |
| baseline | all | [40,50) [10,20)  | 2.127819975772693   |
| baseline | all | [40,50) [20,30)  | 2.2318070785360686  |
| baseline | all | [40,50) [30,40)  | 2.583084584033303   |

|          |     |                  |                     |
|----------|-----|------------------|---------------------|
| baseline | all | [40,50) [40,50)  | 4.0598661736153545  |
| baseline | all | [40,50) [50,60)  | 2.2355661616994307  |
| baseline | all | [40,50) [60,70)  | 1.059590165511839   |
| baseline | all | [40,50) [70,80)  | 0.4996273722515741  |
| baseline | all | [40,50) [80,Inf] | 0.24827546907714237 |
| baseline | all | [50,60) [0,5)    | 0.3720467931635602  |
| baseline | all | [50,60) [5,10)   | 0.4362126465141529  |
| baseline | all | [50,60) [10,20)  | 1.3268884294375678  |
| baseline | all | [50,60) [20,30)  | 1.7643273256527996  |
| baseline | all | [50,60) [30,40)  | 1.6598401761921713  |
| baseline | all | [50,60) [40,50)  | 2.1300556682278553  |
| baseline | all | [50,60) [50,60)  | 2.7446057150540275  |
| baseline | all | [50,60) [60,70)  | 1.3302552326398727  |
| baseline | all | [50,60) [70,80)  | 0.5796213551064978  |
| baseline | all | [50,60) [80,Inf] | 0.3405722962771107  |
| baseline | all | [60,70) [0,5)    | 0.2826752058499303  |
| baseline | all | [60,70) [5,10)   | 0.2814714600639131  |
| baseline | all | [60,70) [10,20)  | 0.6393681975131799  |
| baseline | all | [60,70) [20,30)  | 0.9174847454335503  |
| baseline | all | [60,70) [30,40)  | 1.0218833408928012  |
| baseline | all | [60,70) [40,50)  | 1.198154121849265   |
| baseline | all | [60,70) [50,60)  | 1.5787364495766136  |
| baseline | all | [60,70) [60,70)  | 2.199995059391792   |
| baseline | all | [60,70) [70,80)  | 1.0280006598918592  |
| baseline | all | [60,70) [80,Inf] | 0.43441584431871605 |
| baseline | all | [70,80) [0,5)    | 0.15081485263202044 |
| baseline | all | [70,80) [5,10)   | 0.17063509458401244 |
| baseline | all | [70,80) [10,20)  | 0.37741407313822284 |
| baseline | all | [70,80) [20,30)  | 0.5412414543671902  |
| baseline | all | [70,80) [30,40)  | 0.6279731562455445  |
| baseline | all | [70,80) [40,50)  | 0.8533205976883831  |

|          |           |          |          |                     |
|----------|-----------|----------|----------|---------------------|
| baseline | all       | [70,80)  | [50,60)  | 1.0389815413996486  |
| baseline | all       | [70,80)  | [60,70)  | 1.5527286546170018  |
| baseline | all       | [70,80)  | [70,80)  | 2.4740919069515948  |
| baseline | all       | [70,80)  | [80,Inf] | 0.9990422350832439  |
| baseline | all       | [80,Inf] | [0,5)    | 0.10014661285125653 |
| baseline | all       | [80,Inf] | [5,10)   | 0.08460601833047882 |
| baseline | all       | [80,Inf] | [10,20)  | 0.2253129686980694  |
| baseline | all       | [80,Inf] | [20,30)  | 0.6454249318067132  |
| baseline | all       | [80,Inf] | [30,40)  | 0.7048926991262647  |
| baseline | all       | [80,Inf] | [40,50)  | 0.7654974328652318  |
| baseline | all       | [80,Inf] | [50,60)  | 1.1020500223634009  |
| baseline | all       | [80,Inf] | [60,70)  | 1.1845361749416363  |
| baseline | all       | [80,Inf] | [70,80)  | 1.803649485947723   |
| baseline | all       | [80,Inf] | [80,Inf] | 1.4572052689113548  |
| baseline | community | [0,5)    | [0,5)    | 5.431546880006931   |
| baseline | community | [0,5)    | [5,10)   | 1.7757184974779268  |
| baseline | community | [0,5)    | [10,20)  | 1.16139251024841    |
| baseline | community | [0,5)    | [20,30)  | 1.1090859430458224  |
| baseline | community | [0,5)    | [30,40)  | 1.4297316584824469  |
| baseline | community | [0,5)    | [40,50)  | 1.2554718803223726  |
| baseline | community | [0,5)    | [50,60)  | 1.0017166414257557  |
| baseline | community | [0,5)    | [60,70)  | 0.6525994581498071  |
| baseline | community | [0,5)    | [70,80)  | 0.241818158324518   |
| baseline | community | [0,5)    | [80,Inf] | 0.085020556804826   |
| baseline | community | [5,10)   | [0,5)    | 1.6669384621544687  |
| baseline | community | [5,10)   | [5,10)   | 9.120774264458923   |
| baseline | community | [5,10)   | [10,20)  | 3.4911565538358924  |
| baseline | community | [5,10)   | [20,30)  | 1.8142515390421365  |
| baseline | community | [5,10)   | [30,40)  | 1.62869342361797    |
| baseline | community | [5,10)   | [40,50)  | 1.544594304991439   |
| baseline | community | [5,10)   | [50,60)  | 1.0268226282910429  |

|          |           |         |          |                     |
|----------|-----------|---------|----------|---------------------|
| baseline | community | [5,10)  | [60,70)  | 0.6074364619049684  |
| baseline | community | [5,10)  | [70,80)  | 0.2512163173536992  |
| baseline | community | [5,10)  | [80,Inf] | 0.07351803401031781 |
| baseline | community | [10,20) | [0,5)    | 0.502592816743358   |
| baseline | community | [10,20) | [5,10)   | 1.6093347895506156  |
| baseline | community | [10,20) | [10,20)  | 9.971286058283768   |
| baseline | community | [10,20) | [20,30)  | 2.942494829691994   |
| baseline | community | [10,20) | [30,40)  | 1.7280153420885396  |
| baseline | community | [10,20) | [40,50)  | 1.8176328098813872  |
| baseline | community | [10,20) | [50,60)  | 1.2772294539808002  |
| baseline | community | [10,20) | [60,70)  | 0.6245425065639117  |
| baseline | community | [10,20) | [70,80)  | 0.2622873926561113  |
| baseline | community | [10,20) | [80,Inf] | 0.09141463011667969 |
| baseline | community | [20,30) | [0,5)    | 0.44865893845256927 |
| baseline | community | [20,30) | [5,10)   | 0.7817943475456287  |
| baseline | community | [20,30) | [10,20)  | 2.750598087200861   |
| baseline | community | [20,30) | [20,30)  | 4.869331858086486   |
| baseline | community | [20,30) | [30,40)  | 2.572129846636442   |
| baseline | community | [20,30) | [40,50)  | 2.166379158537687   |
| baseline | community | [20,30) | [50,60)  | 1.6642495080364075  |
| baseline | community | [20,30) | [60,70)  | 0.8036170842103314  |
| baseline | community | [20,30) | [70,80)  | 0.3465468577084065  |
| baseline | community | [20,30) | [80,Inf] | 0.2102016420173198  |
| baseline | community | [30,40) | [0,5)    | 0.6082766430072056  |
| baseline | community | [30,40) | [5,10)   | 0.7381229176110249  |
| baseline | community | [30,40) | [10,20)  | 1.6988469179641115  |
| baseline | community | [30,40) | [20,30)  | 2.7051316902295084  |
| baseline | community | [30,40) | [30,40)  | 3.7858328716476906  |
| baseline | community | [30,40) | [40,50)  | 2.785329928151861   |
| baseline | community | [30,40) | [50,60)  | 1.8786069793452755  |
| baseline | community | [30,40) | [60,70)  | 0.9826090944779176  |

|          |           |                  |                     |
|----------|-----------|------------------|---------------------|
| baseline | community | [30,40) [70,80)  | 0.4283181817964187  |
| baseline | community | [30,40) [80,Inf] | 0.25070171572558303 |
| baseline | community | [40,50) [0,5)    | 0.4647419174268971  |
| baseline | community | [40,50) [5,10)   | 0.6090592761094537  |
| baseline | community | [40,50) [10,20)  | 1.5547919860667434  |
| baseline | community | [40,50) [20,30)  | 1.9823912006606779  |
| baseline | community | [40,50) [30,40)  | 2.423483788626891   |
| baseline | community | [40,50) [40,50)  | 3.651824434401357   |
| baseline | community | [40,50) [50,60)  | 2.0985086620947224  |
| baseline | community | [40,50) [60,70)  | 1.0463616521393935  |
| baseline | community | [40,50) [70,80)  | 0.5020295792722752  |
| baseline | community | [40,50) [80,Inf] | 0.24959129054171622 |
| baseline | community | [50,60) [0,5)    | 0.3533071995522148  |
| baseline | community | [50,60) [5,10)   | 0.38578049513300555 |
| baseline | community | [50,60) [10,20)  | 1.0409746024661868  |
| baseline | community | [50,60) [20,30)  | 1.4510208071446586  |
| baseline | community | [50,60) [30,40)  | 1.557405477104481   |
| baseline | community | [50,60) [40,50)  | 1.9994677844347233  |
| baseline | community | [50,60) [50,60)  | 2.3254011613690295  |
| baseline | community | [50,60) [60,70)  | 1.235040652586994   |
| baseline | community | [50,60) [70,80)  | 0.58925404827306    |
| baseline | community | [50,60) [80,Inf] | 0.3328431174670522  |
| baseline | community | [60,70) [0,5)    | 0.2731609556479113  |
| baseline | community | [60,70) [5,10)   | 0.270845004132822   |
| baseline | community | [60,70) [10,20)  | 0.6040887608290078  |
| baseline | community | [60,70) [20,30)  | 0.8315253068437565  |
| baseline | community | [60,70) [30,40)  | 0.9667516978530365  |
| baseline | community | [60,70) [40,50)  | 1.1831944114603787  |
| baseline | community | [60,70) [50,60)  | 1.4657366974417108  |
| baseline | community | [60,70) [60,70)  | 1.7155453613420382  |
| baseline | community | [60,70) [70,80)  | 0.9458226608420033  |

|          |           |          |          |                       |
|----------|-----------|----------|----------|-----------------------|
| baseline | community | [60,70)  | [80,Inf] | 0.4458528069089014    |
| baseline | community | [70,80)  | [0,5)    | 0.15288264038518534   |
| baseline | community | [70,80)  | [5,10)   | 0.1691882427223992    |
| baseline | community | [70,80)  | [10,20)  | 0.3831874437865965    |
| baseline | community | [70,80)  | [20,30)  | 0.5415955205007799    |
| baseline | community | [70,80)  | [30,40)  | 0.6364866589282963    |
| baseline | community | [70,80)  | [40,50)  | 0.8574226496403199    |
| baseline | community | [70,80)  | [50,60)  | 1.0562487581845932    |
| baseline | community | [70,80)  | [60,70)  | 1.4286036524144088    |
| baseline | community | [70,80)  | [70,80)  | 1.9440214639532774    |
| baseline | community | [70,80)  | [80,Inf] | 0.8816184691740818    |
| baseline | community | [80,Inf] | [0,5)    | 0.09703373512796923   |
| baseline | community | [80,Inf] | [5,10)   | 0.0893831890356755    |
| baseline | community | [80,Inf] | [10,20)  | 0.2410977108373206    |
| baseline | community | [80,Inf] | [20,30)  | 0.5930437698335163    |
| baseline | community | [80,Inf] | [30,40)  | 0.6725632936980316    |
| baseline | community | [80,Inf] | [40,50)  | 0.7695547307240866    |
| baseline | community | [80,Inf] | [50,60)  | 1.0770428063123256    |
| baseline | community | [80,Inf] | [60,70)  | 1.2157222390384788    |
| baseline | community | [80,Inf] | [70,80)  | 1.5916509629257756    |
| baseline | community | [80,Inf] | [80,Inf] | 1.215049971559131     |
| baseline | household | [0,5)    | [0,5)    | 0.4070408625662851    |
| baseline | household | [0,5)    | [5,10)   | 0.32730910398861673   |
| baseline | household | [0,5)    | [10,20)  | 0.10014262765699103   |
| baseline | household | [0,5)    | [20,30)  | 0.24758823467515287   |
| baseline | household | [0,5)    | [30,40)  | 1.061190289703929     |
| baseline | household | [0,5)    | [40,50)  | 0.2608654922377719    |
| baseline | household | [0,5)    | [50,60)  | 0.015498542453068838  |
| baseline | household | [0,5)    | [60,70)  | 0.0021364249791333842 |
| baseline | household | [0,5)    | [70,80)  | 6.746020620367068e-4  |
| baseline | household | [0,5)    | [80,Inf] | 1.3260271162515738e-4 |

|          |           |         |          |                       |
|----------|-----------|---------|----------|-----------------------|
| baseline | household | [5,10)  | [0,5)    | 0.30727042637434937   |
| baseline | household | [5,10)  | [5,10)   | 0.41975894142772285   |
| baseline | household | [5,10)  | [10,20)  | 0.4163466135534939    |
| baseline | household | [5,10)  | [20,30)  | 0.07982204035388576   |
| baseline | household | [5,10)  | [30,40)  | 0.674127507984427     |
| baseline | household | [5,10)  | [40,50)  | 0.7216065752826084    |
| baseline | household | [5,10)  | [50,60)  | 0.0797467087718552    |
| baseline | household | [5,10)  | [60,70)  | 0.009696030256648487  |
| baseline | household | [5,10)  | [70,80)  | 0.0018323544172112478 |
| baseline | household | [5,10)  | [80,Inf] | 4.828996207068691e-4  |
| baseline | household | [10,20) | [0,5)    | 0.043334485608693026  |
| baseline | household | [10,20) | [5,10)   | 0.19192683534893304   |
| baseline | household | [10,20) | [10,20)  | 0.8575386664602787    |
| baseline | household | [10,20) | [20,30)  | 0.19114860330716      |
| baseline | household | [10,20) | [30,40)  | 0.1295715987274422    |
| baseline | household | [10,20) | [40,50)  | 0.9314284116356336    |
| baseline | household | [10,20) | [50,60)  | 0.4347193662378137    |
| baseline | household | [10,20) | [60,70)  | 0.03193287786356278   |
| baseline | household | [10,20) | [70,80)  | 0.005162709356613486  |
| baseline | household | [10,20) | [80,Inf] | 0.002158716603376439  |
| baseline | household | [20,30) | [0,5)    | 0.10015923985769302   |
| baseline | household | [20,30) | [5,10)   | 0.034394692173712015  |
| baseline | household | [20,30) | [10,20)  | 0.17868311108042392   |
| baseline | household | [20,30) | [20,30)  | 0.5514599619661026    |
| baseline | household | [20,30) | [30,40)  | 0.09706891014570301   |
| baseline | household | [20,30) | [40,50)  | 0.10507481518187532   |
| baseline | household | [20,30) | [50,60)  | 0.38509862675927303   |
| baseline | household | [20,30) | [60,70)  | 0.09395158793150896   |
| baseline | household | [20,30) | [70,80)  | 0.007617222139560039  |
| baseline | household | [20,30) | [80,Inf] | 0.0020881361139043126 |
| baseline | household | [30,40) | [0,5)    | 0.45149630793426443   |



|          |           |                  |                       |
|----------|-----------|------------------|-----------------------|
| baseline | household | [30,40) [5,10)   | 0.30552035871744104   |
| baseline | household | [30,40) [10,20)  | 0.12738909728854642   |
| baseline | household | [30,40) [20,30)  | 0.10208895446142797   |
| baseline | household | [30,40) [30,40)  | 0.5004214984405465    |
| baseline | household | [30,40) [40,50)  | 0.13673597023713677   |
| baseline | household | [30,40) [50,60)  | 0.03556035266058932   |
| baseline | household | [30,40) [60,70)  | 0.0361682660710427    |
| baseline | household | [30,40) [70,80)  | 0.006123515348726495  |
| baseline | household | [30,40) [80,Inf] | 0.0027158625499718665 |
| baseline | household | [40,50) [0,5)    | 0.09656426743315541   |
| baseline | household | [40,50) [5,10)   | 0.28454562000706995   |
| baseline | household | [40,50) [10,20)  | 0.796763115027339     |
| baseline | household | [40,50) [20,30)  | 0.09615209475220465   |
| baseline | household | [40,50) [30,40)  | 0.1189700551974524    |
| baseline | household | [40,50) [40,50)  | 0.45569203712092426   |
| baseline | household | [40,50) [50,60)  | 0.12059645690895449   |
| baseline | household | [40,50) [60,70)  | 0.01681550585088913   |
| baseline | household | [40,50) [70,80)  | 0.009172671252767791  |
| baseline | household | [40,50) [80,Inf] | 0.0032941308275034483 |
| baseline | household | [50,60) [0,5)    | 0.0054663645330916295 |
| baseline | household | [50,60) [5,10)   | 0.029960975606369657  |
| baseline | household | [50,60) [10,20)  | 0.3542990349901927    |
| baseline | household | [50,60) [20,30)  | 0.3357545322760951    |
| baseline | household | [50,60) [30,40)  | 0.02948081306993221   |
| baseline | household | [50,60) [40,50)  | 0.1148991237605592    |
| baseline | household | [50,60) [50,60)  | 0.47037489993179143   |
| baseline | household | [50,60) [60,70)  | 0.11123235392751113   |
| baseline | household | [50,60) [70,80)  | 0.00818798645408956   |
| baseline | household | [50,60) [80,Inf] | 0.00370180543914048   |
| baseline | household | [60,70) [0,5)    | 8.942349430740162e-4  |
| baseline | household | [60,70) [5,10)   | 0.004323055630922437  |

|            |           |          |          |                       |
|------------|-----------|----------|----------|-----------------------|
| baseline   | household | [60,70)  | [10,20)  | 0.030888665598864433  |
| baseline   | household | [60,70)  | [20,30)  | 0.09721867881516932   |
| baseline   | household | [60,70)  | [30,40)  | 0.03558499530029821   |
| baseline   | household | [60,70)  | [40,50)  | 0.01901412063979772   |
| baseline   | household | [60,70)  | [50,60)  | 0.13200664925416708   |
| baseline   | household | [60,70)  | [60,70)  | 0.5716054838561209    |
| baseline   | household | [60,70)  | [70,80)  | 0.08511377080125268   |
| baseline   | household | [60,70)  | [80,Inf] | 0.0064229007327088325 |
| baseline   | household | [70,80)  | [0,5)    | 4.264933009124747e-4  |
| baseline   | household | [70,80)  | [5,10)   | 0.001233995620044588  |
| baseline   | household | [70,80)  | [10,20)  | 0.007542505097738782  |
| baseline   | household | [70,80)  | [20,30)  | 0.011904511253696978  |
| baseline   | household | [70,80)  | [30,40)  | 0.009099708802517582  |
| baseline   | household | [70,80)  | [40,50)  | 0.01566630621038694   |
| baseline   | household | [70,80)  | [50,60)  | 0.014676992488601277  |
| baseline   | household | [70,80)  | [60,70)  | 0.12855789720071428   |
| baseline   | household | [70,80)  | [70,80)  | 0.5202111855867388    |
| baseline   | household | [70,80)  | [80,Inf] | 0.08363388880376807   |
| baseline   | household | [80,Inf] | [0,5)    | 1.5134316002273797e-4 |
| baseline   | household | [80,Inf] | [5,10)   | 5.870930907831077e-4  |
| baseline   | household | [80,Inf] | [10,20)  | 0.005693467680223771  |
| baseline   | household | [80,Inf] | [20,30)  | 0.005891440235588357  |
| baseline   | household | [80,Inf] | [30,40)  | 0.007285718943480542  |
| baseline   | household | [80,Inf] | [40,50)  | 0.010156714819004676  |
| baseline   | household | [80,Inf] | [50,60)  | 0.011979105642857717  |
| baseline   | household | [80,Inf] | [60,70)  | 0.01751365501393864   |
| baseline   | household | [80,Inf] | [70,80)  | 0.15099598860263677   |
| baseline   | household | [80,Inf] | [80,Inf] | 0.2683356020398899    |
| April 2020 | all       | [0,5)    | [0,5)    | 1.1760647800283484    |
| April 2020 | all       | [0,5)    | [5,10)   | 0.5875298876820264    |
| April 2020 | all       | [0,5)    | [10,20)  | 0.5400699416922248    |

|            |     |         |          |                      |
|------------|-----|---------|----------|----------------------|
| April 2020 | all | [0,5)   | [20,30)  | 0.578921241529211    |
| April 2020 | all | [0,5)   | [30,40)  | 1.021089250584432    |
| April 2020 | all | [0,5)   | [40,50)  | 0.7932185991971371   |
| April 2020 | all | [0,5)   | [50,60)  | 0.5726735956629352   |
| April 2020 | all | [0,5)   | [60,70)  | 0.5126679296879905   |
| April 2020 | all | [0,5)   | [70,80)  | 0.11706925879403335  |
| April 2020 | all | [0,5)   | [80,Inf] | 0.017247730603044378 |
| April 2020 | all | [5,10)  | [0,5)    | 0.5546231624103924   |
| April 2020 | all | [5,10)  | [5,10)   | 1.1257333803029383   |
| April 2020 | all | [5,10)  | [10,20)  | 0.9137547883991088   |
| April 2020 | all | [5,10)  | [20,30)  | 0.5722564331973451   |
| April 2020 | all | [5,10)  | [30,40)  | 0.8518177612831974   |
| April 2020 | all | [5,10)  | [40,50)  | 0.9383075401244417   |
| April 2020 | all | [5,10)  | [50,60)  | 0.5077781832573309   |
| April 2020 | all | [5,10)  | [60,70)  | 0.2443319513726792   |
| April 2020 | all | [5,10)  | [70,80)  | 0.08326748033456127  |
| April 2020 | all | [5,10)  | [80,Inf] | 0.01669700083175268  |
| April 2020 | all | [10,20) | [0,5)    | 0.23289665817247532  |
| April 2020 | all | [10,20) | [5,10)   | 0.4174218509556902   |
| April 2020 | all | [10,20) | [10,20)  | 1.5201235614755577   |
| April 2020 | all | [10,20) | [20,30)  | 0.7569827538265377   |
| April 2020 | all | [10,20) | [30,40)  | 0.6665149023664506   |
| April 2020 | all | [10,20) | [40,50)  | 0.9677321210649882   |
| April 2020 | all | [10,20) | [50,60)  | 0.6708700048095472   |
| April 2020 | all | [10,20) | [60,70)  | 0.2217230020923736   |
| April 2020 | all | [10,20) | [70,80)  | 0.0937691622653481   |
| April 2020 | all | [10,20) | [80,Inf] | 0.026800362071121887 |
| April 2020 | all | [20,30) | [0,5)    | 0.22771692331426435  |
| April 2020 | all | [20,30) | [5,10)   | 0.23844946869220268  |
| April 2020 | all | [20,30) | [10,20)  | 0.6904716699375492   |
| April 2020 | all | [20,30) | [20,30)  | 1.2875902393239995   |

|            |     |                  |                      |
|------------|-----|------------------|----------------------|
| April 2020 | all | [20,30) [30,40)  | 0.8736405382064821   |
| April 2020 | all | [20,30) [40,50)  | 0.8573686311665957   |
| April 2020 | all | [20,30) [50,60)  | 0.8051095733181638   |
| April 2020 | all | [20,30) [60,70)  | 0.3091656184405833   |
| April 2020 | all | [20,30) [70,80)  | 0.12005911840002544  |
| April 2020 | all | [20,30) [80,Inf] | 0.052768007370853326 |
| April 2020 | all | [30,40) [0,5)    | 0.41947505249281714  |
| April 2020 | all | [30,40) [5,10)   | 0.3706954763928983   |
| April 2020 | all | [30,40) [10,20)  | 0.6349430796839566   |
| April 2020 | all | [30,40) [20,30)  | 0.9124227361155588   |
| April 2020 | all | [30,40) [30,40)  | 1.425624195188558    |
| April 2020 | all | [30,40) [40,50)  | 1.089056042761873    |
| April 2020 | all | [30,40) [50,60)  | 0.8073879405068872   |
| April 2020 | all | [30,40) [60,70)  | 0.38127559978627085  |
| April 2020 | all | [30,40) [70,80)  | 0.15799781337183094  |
| April 2020 | all | [30,40) [80,Inf] | 0.07013617722233088  |
| April 2020 | all | [40,50) [0,5)    | 0.30382143439951365  |
| April 2020 | all | [40,50) [5,10)   | 0.3807210421679003   |
| April 2020 | all | [40,50) [10,20)  | 0.8595528259943088   |
| April 2020 | all | [40,50) [20,30)  | 0.8348784907688682   |
| April 2020 | all | [40,50) [30,40)  | 1.0154099812627861   |
| April 2020 | all | [40,50) [40,50)  | 1.6283033180882782   |
| April 2020 | all | [40,50) [50,60)  | 0.9292888720601618   |
| April 2020 | all | [40,50) [60,70)  | 0.3998304551518352   |
| April 2020 | all | [40,50) [70,80)  | 0.22617403117424129  |
| April 2020 | all | [40,50) [80,Inf] | 0.12912370474498536  |
| April 2020 | all | [50,60) [0,5)    | 0.19772531877870142  |
| April 2020 | all | [50,60) [5,10)   | 0.18571903159831654  |
| April 2020 | all | [50,60) [10,20)  | 0.5371248807897762   |
| April 2020 | all | [50,60) [20,30)  | 0.7067008260093693   |
| April 2020 | all | [50,60) [30,40)  | 0.6785808236519729   |

|            |     |                  |                      |
|------------|-----|------------------|----------------------|
| April 2020 | all | [50,60) [40,50)  | 0.8376816314756509   |
| April 2020 | all | [50,60) [50,60)  | 1.211741845367384    |
| April 2020 | all | [50,60) [60,70)  | 0.5426519565509331   |
| April 2020 | all | [50,60) [70,80)  | 0.3174927722904943   |
| April 2020 | all | [50,60) [80,Inf] | 0.18915510017686157  |
| April 2020 | all | [60,70) [0,5)    | 0.2124389334190808   |
| April 2020 | all | [60,70) [5,10)   | 0.10725859096261814  |
| April 2020 | all | [60,70) [10,20)  | 0.21306864265187175  |
| April 2020 | all | [60,70) [20,30)  | 0.32571362757022626  |
| April 2020 | all | [60,70) [30,40)  | 0.38460967260228335  |
| April 2020 | all | [60,70) [40,50)  | 0.4325827300600576   |
| April 2020 | all | [60,70) [50,60)  | 0.6513061026743447   |
| April 2020 | all | [60,70) [60,70)  | 0.9218564475858257   |
| April 2020 | all | [60,70) [70,80)  | 0.44369546062196863  |
| April 2020 | all | [60,70) [80,Inf] | 0.1640669735419115   |
| April 2020 | all | [70,80) [0,5)    | 0.06661145404993946  |
| April 2020 | all | [70,80) [5,10)   | 0.050189429853607886 |
| April 2020 | all | [70,80) [10,20)  | 0.12372205137478436  |
| April 2020 | all | [70,80) [20,30)  | 0.17366779764527143  |
| April 2020 | all | [70,80) [30,40)  | 0.2188340398270445   |
| April 2020 | all | [70,80) [40,50)  | 0.33598329258574183  |
| April 2020 | all | [70,80) [50,60)  | 0.5232065225770091   |
| April 2020 | all | [70,80) [60,70)  | 0.6092103228919242   |
| April 2020 | all | [70,80) [70,80)  | 0.9948947652733395   |
| April 2020 | all | [70,80) [80,Inf] | 0.19782349750611133  |
| April 2020 | all | [80,Inf] [0,5)   | 0.018699794982934767 |
| April 2020 | all | [80,Inf] [5,10)  | 0.019176527275207744 |
| April 2020 | all | [80,Inf] [10,20) | 0.06738025628839803  |
| April 2020 | all | [80,Inf] [20,30) | 0.14543851451825143  |
| April 2020 | all | [80,Inf] [30,40) | 0.18509738898066636  |
| April 2020 | all | [80,Inf] [40,50) | 0.36548403715753963  |

|            |           |          |          |                      |
|------------|-----------|----------|----------|----------------------|
| April 2020 | all       | [80,Inf] | [50,60)  | 0.5939460521196533   |
| April 2020 | all       | [80,Inf] | [60,70)  | 0.42923606352322935  |
| April 2020 | all       | [80,Inf] | [70,80)  | 0.37694670495451443  |
| April 2020 | all       | [80,Inf] | [80,Inf] | 0.3621969070338579   |
| April 2020 | community | [0,5)    | [0,5)    | 0.3646066937544967   |
| April 2020 | community | [0,5)    | [5,10)   | 0.23277438675886775  |
| April 2020 | community | [0,5)    | [10,20)  | 0.24736496258080135  |
| April 2020 | community | [0,5)    | [20,30)  | 0.18699000414917533  |
| April 2020 | community | [0,5)    | [30,40)  | 0.21353930869007756  |
| April 2020 | community | [0,5)    | [40,50)  | 0.2669119038322729   |
| April 2020 | community | [0,5)    | [50,60)  | 0.36745877473361     |
| April 2020 | community | [0,5)    | [60,70)  | 0.43059228077196454  |
| April 2020 | community | [0,5)    | [70,80)  | 0.07987992594629864  |
| April 2020 | community | [0,5)    | [80,Inf] | 0.007390587548313975 |
| April 2020 | community | [5,10)   | [0,5)    | 0.2197370975636243   |
| April 2020 | community | [5,10)   | [5,10)   | 0.683453529241781    |
| April 2020 | community | [5,10)   | [10,20)  | 0.49385228854092655  |
| April 2020 | community | [5,10)   | [20,30)  | 0.26357825712998617  |
| April 2020 | community | [5,10)   | [30,40)  | 0.26349264363918223  |
| April 2020 | community | [5,10)   | [40,50)  | 0.29182560088503934  |
| April 2020 | community | [5,10)   | [50,60)  | 0.24031403100412996  |
| April 2020 | community | [5,10)   | [60,70)  | 0.1782300654192099   |
| April 2020 | community | [5,10)   | [70,80)  | 0.069685130524172    |
| April 2020 | community | [5,10)   | [80,Inf] | 0.013337025180202581 |
| April 2020 | community | [10,20)  | [0,5)    | 0.10667149707413237  |
| April 2020 | community | [10,20)  | [5,10)   | 0.2256043219871066   |
| April 2020 | community | [10,20)  | [10,20)  | 0.9032642036534505   |
| April 2020 | community | [10,20)  | [20,30)  | 0.4483058240342007   |
| April 2020 | community | [10,20)  | [30,40)  | 0.3291359832490927   |
| April 2020 | community | [10,20)  | [40,50)  | 0.34092990591315925  |
| April 2020 | community | [10,20)  | [50,60)  | 0.26477395554638056  |

|            |           |                  |                      |
|------------|-----------|------------------|----------------------|
| April 2020 | community | [10,20) [60,70)  | 0.14451851163532395  |
| April 2020 | community | [10,20) [70,80)  | 0.08441104043783408  |
| April 2020 | community | [10,20) [80,Inf] | 0.027938710374217076 |
| April 2020 | community | [20,30) [0,5)    | 0.07355077851855162  |
| April 2020 | community | [20,30) [5,10)   | 0.10982892329353772  |
| April 2020 | community | [20,30) [10,20)  | 0.40891655512922537  |
| April 2020 | community | [20,30) [20,30)  | 0.8663049896974029   |
| April 2020 | community | [20,30) [30,40)  | 0.5976289047242478   |
| April 2020 | community | [20,30) [40,50)  | 0.5398641140140658   |
| April 2020 | community | [20,30) [50,60)  | 0.45809694574239823  |
| April 2020 | community | [20,30) [60,70)  | 0.21149913300220144  |
| April 2020 | community | [20,30) [70,80)  | 0.10860624025236812  |
| April 2020 | community | [20,30) [80,Inf] | 0.055586327309509215 |
| April 2020 | community | [30,40) [0,5)    | 0.08772498514311655  |
| April 2020 | community | [30,40) [5,10)   | 0.11466784587421879  |
| April 2020 | community | [30,40) [10,20)  | 0.3135434437330058   |
| April 2020 | community | [30,40) [20,30)  | 0.6241601718961317   |
| April 2020 | community | [30,40) [30,40)  | 1.0500851417157624   |
| April 2020 | community | [30,40) [40,50)  | 0.8709354947403554   |
| April 2020 | community | [30,40) [50,60)  | 0.6696360655506691   |
| April 2020 | community | [30,40) [60,70)  | 0.32819652583905246  |
| April 2020 | community | [30,40) [70,80)  | 0.14990549735872585  |
| April 2020 | community | [30,40) [80,Inf] | 0.07375344392677897  |
| April 2020 | community | [40,50) [0,5)    | 0.10223300125976902  |
| April 2020 | community | [40,50) [5,10)   | 0.11841096546566689  |
| April 2020 | community | [40,50) [10,20)  | 0.3028187536660655   |
| April 2020 | community | [40,50) [20,30)  | 0.5257035167693755   |
| April 2020 | community | [40,50) [30,40)  | 0.8120403436855991   |
| April 2020 | community | [40,50) [40,50)  | 1.2813294884896065   |
| April 2020 | community | [40,50) [50,60)  | 0.7724308882129276   |
| April 2020 | community | [40,50) [60,70)  | 0.3596952451612189   |

|            |           |                  |                     |
|------------|-----------|------------------|---------------------|
| April 2020 | community | [40,50) [70,80)  | 0.21796061827260754 |
| April 2020 | community | [40,50) [80,Inf] | 0.13296213008975902 |
| April 2020 | community | [50,60) [0,5)    | 0.1268710436554203  |
| April 2020 | community | [50,60) [5,10)   | 0.08789438479384616 |
| April 2020 | community | [50,60) [10,20)  | 0.21198821941478735 |
| April 2020 | community | [50,60) [20,30)  | 0.4021032683091342  |
| April 2020 | community | [50,60) [30,40)  | 0.5628062682149229  |
| April 2020 | community | [50,60) [40,50)  | 0.6962880057608908  |
| April 2020 | community | [50,60) [50,60)  | 0.8022038630828249  |
| April 2020 | community | [50,60) [60,70)  | 0.3935406785936754  |
| April 2020 | community | [50,60) [70,80)  | 0.2688530227728949  |
| April 2020 | community | [50,60) [80,Inf] | 0.18498821969097723 |
| April 2020 | community | [60,70) [0,5)    | 0.17842600120833832 |
| April 2020 | community | [60,70) [5,10)   | 0.07824122707796444 |
| April 2020 | community | [60,70) [10,20)  | 0.13887774327995553 |
| April 2020 | community | [60,70) [20,30)  | 0.22282027848282016 |
| April 2020 | community | [60,70) [30,40)  | 0.33106598446630253 |
| April 2020 | community | [60,70) [40,50)  | 0.38916007761599136 |
| April 2020 | community | [60,70) [50,60)  | 0.47233795039278476 |
| April 2020 | community | [60,70) [60,70)  | 0.4661455597492005  |
| April 2020 | community | [60,70) [70,80)  | 0.2704888180414184  |
| April 2020 | community | [60,70) [80,Inf] | 0.12028937093965515 |
| April 2020 | community | [70,80) [0,5)    | 0.04545065393408422 |
| April 2020 | community | [70,80) [5,10)   | 0.04200266726515043 |
| April 2020 | community | [70,80) [10,20)  | 0.1113744583959231  |
| April 2020 | community | [70,80) [20,30)  | 0.15710081459804948 |
| April 2020 | community | [70,80) [30,40)  | 0.20762584773598786 |
| April 2020 | community | [70,80) [40,50)  | 0.3237822695330862  |
| April 2020 | community | [70,80) [50,60)  | 0.44304954538274294 |
| April 2020 | community | [70,80) [60,70)  | 0.3713921209855806  |
| April 2020 | community | [70,80) [70,80)  | 0.47596126690675467 |



|            |           |          |          |                       |
|------------|-----------|----------|----------|-----------------------|
| April 2020 | community | [70,80)  | [80,Inf] | 0.06728406924411334   |
| April 2020 | community | [80,Inf] | [0,5)    | 0.008012703461671539  |
| April 2020 | community | [80,Inf] | [5,10)   | 0.015317583313786012  |
| April 2020 | community | [80,Inf] | [10,20)  | 0.07024226973952001   |
| April 2020 | community | [80,Inf] | [20,30)  | 0.15320643293028832   |
| April 2020 | community | [80,Inf] | [30,40)  | 0.19464382061866048   |
| April 2020 | community | [80,Inf] | [40,50)  | 0.3763487908008097    |
| April 2020 | community | [80,Inf] | [50,60)  | 0.5808606610759302    |
| April 2020 | community | [80,Inf] | [60,70)  | 0.31470264600095305   |
| April 2020 | community | [80,Inf] | [70,80)  | 0.12820567013034773   |
| April 2020 | community | [80,Inf] | [80,Inf] | 0.05645125537473782   |
| April 2020 | household | [0,5)    | [0,5)    | 0.8210030831297492    |
| April 2020 | household | [0,5)    | [5,10)   | 0.42306356931328293   |
| April 2020 | household | [0,5)    | [10,20)  | 0.1682471989405442    |
| April 2020 | household | [0,5)    | [20,30)  | 0.2735336221937439    |
| April 2020 | household | [0,5)    | [30,40)  | 1.3472612281921932    |
| April 2020 | household | [0,5)    | [40,50)  | 0.42903744813946376   |
| April 2020 | household | [0,5)    | [50,60)  | 0.06824433269517892   |
| April 2020 | household | [0,5)    | [60,70)  | 0.04925730633764947   |
| April 2020 | household | [0,5)    | [70,80)  | 0.041633768827222396  |
| April 2020 | household | [0,5)    | [80,Inf] | 0.022796126445601715  |
| April 2020 | household | [5,10)   | [0,5)    | 0.3993659450672259    |
| April 2020 | household | [5,10)   | [5,10)   | 0.5535338802174224    |
| April 2020 | household | [5,10)   | [10,20)  | 0.38419010213155086   |
| April 2020 | household | [5,10)   | [20,30)  | 0.08206546677197935   |
| April 2020 | household | [5,10)   | [30,40)  | 0.8113877549661407    |
| April 2020 | household | [5,10)   | [40,50)  | 0.8760493820565902    |
| April 2020 | household | [5,10)   | [50,60)  | 0.10850698668372574   |
| April 2020 | household | [5,10)   | [60,70)  | 0.025856832207633084  |
| April 2020 | household | [5,10)   | [70,80)  | 0.005871734528101912  |
| April 2020 | household | [5,10)   | [80,Inf] | 0.0011714474677208984 |

|            |           |                  |                       |
|------------|-----------|------------------|-----------------------|
| April 2020 | household | [10,20) [0,5)    | 0.07255534783144396   |
| April 2020 | household | [10,20) [5,10)   | 0.17550167721775356   |
| April 2020 | household | [10,20) [10,20)  | 0.9133707082748583    |
| April 2020 | household | [10,20) [20,30)  | 0.16462111404430427   |
| April 2020 | household | [10,20) [30,40)  | 0.1466622958513173    |
| April 2020 | household | [10,20) [40,50)  | 0.9787940977088019    |
| April 2020 | household | [10,20) [50,60)  | 0.5825898266179115    |
| April 2020 | household | [10,20) [60,70)  | 0.033802583705954466  |
| April 2020 | household | [10,20) [70,80)  | 0.002962835771177684  |
| April 2020 | household | [10,20) [80,Inf] | 2.2926191625413092e-4 |
| April 2020 | household | [20,30) [0,5)    | 0.10759750420381252   |
| April 2020 | household | [20,30) [5,10)   | 0.034195693803276986  |
| April 2020 | household | [20,30) [10,20)  | 0.15015512783803772   |
| April 2020 | household | [20,30) [20,30)  | 0.6059278618419952    |
| April 2020 | household | [20,30) [30,40)  | 0.13651646835073375   |
| April 2020 | household | [20,30) [40,50)  | 0.08843659722274506   |
| April 2020 | household | [20,30) [50,60)  | 0.45164119203773445   |
| April 2020 | household | [20,30) [60,70)  | 0.1139080315556362    |
| April 2020 | household | [20,30) [70,80)  | 0.00559125105771212   |
| April 2020 | household | [20,30) [80,Inf] | 1.8382663901782037e-4 |
| April 2020 | household | [30,40) [0,5)    | 0.5534718605743049    |
| April 2020 | household | [30,40) [5,10)   | 0.3531021476706615    |
| April 2020 | household | [30,40) [10,20)  | 0.1397204408746677    |
| April 2020 | household | [30,40) [20,30)  | 0.1425717023216554    |
| April 2020 | household | [30,40) [30,40)  | 0.5666714913088629    |
| April 2020 | household | [30,40) [40,50)  | 0.13383396773402134   |
| April 2020 | household | [30,40) [50,60)  | 0.03664159291363168   |
| April 2020 | household | [30,40) [60,70)  | 0.03463502883356748   |
| April 2020 | household | [30,40) [70,80)  | 0.008102067845259095  |
| April 2020 | household | [30,40) [80,Inf] | 3.9602314900321115e-4 |
| April 2020 | household | [40,50) [0,5)    | 0.16433111725182115   |

|            |           |                  |                      |
|------------|-----------|------------------|----------------------|
| April 2020 | household | [40,50) [5,10)   | 0.35545785843375327  |
| April 2020 | household | [40,50) [10,20)  | 0.8693822992585897   |
| April 2020 | household | [40,50) [20,30)  | 0.08611676538406984  |
| April 2020 | household | [40,50) [30,40)  | 0.12478249121147973  |
| April 2020 | household | [40,50) [40,50)  | 0.5369036489269697   |
| April 2020 | household | [40,50) [50,60)  | 0.13763134683303116  |
| April 2020 | household | [40,50) [60,70)  | 0.01901461066032581  |
| April 2020 | household | [40,50) [70,80)  | 0.005462305131402382 |
| April 2020 | household | [40,50) [80,Inf] | 9.604859064088381e-4 |
| April 2020 | household | [50,60) [0,5)    | 0.023562978244949503 |
| April 2020 | household | [50,60) [5,10)   | 0.03968588777054593  |
| April 2020 | household | [50,60) [10,20)  | 0.4664400470802419   |
| April 2020 | household | [50,60) [20,30)  | 0.3964378012966417   |
| April 2020 | household | [50,60) [30,40)  | 0.03079551499862011  |
| April 2020 | household | [50,60) [40,50)  | 0.12406122931490343  |
| April 2020 | household | [50,60) [50,60)  | 0.5886824544356134   |
| April 2020 | household | [50,60) [60,70)  | 0.1282062604850048   |
| April 2020 | household | [50,60) [70,80)  | 0.014572240185588763 |
| April 2020 | household | [50,60) [80,Inf] | 0.001552680848167772 |
| April 2020 | household | [60,70) [0,5)    | 0.020412745714805794 |
| April 2020 | household | [60,70) [5,10)   | 0.011350436230677942 |
| April 2020 | household | [60,70) [10,20)  | 0.032483178960315336 |
| April 2020 | household | [60,70) [20,30)  | 0.12000235668625572  |
| April 2020 | household | [60,70) [30,40)  | 0.03493826198883607  |
| April 2020 | household | [60,70) [40,50)  | 0.020571954975940686 |
| April 2020 | household | [60,70) [50,60)  | 0.1538760732279695   |
| April 2020 | household | [60,70) [60,70)  | 0.5856426421271737   |
| April 2020 | household | [60,70) [70,80)  | 0.14207461107184108  |
| April 2020 | household | [60,70) [80,Inf] | 0.01136886715725993  |
| April 2020 | household | [70,80) [0,5)    | 0.023689603156840218 |
| April 2020 | household | [70,80) [5,10)   | 0.003539171181828776 |

|            |           |          |          |                       |
|------------|-----------|----------|----------|-----------------------|
| April 2020 | household | [70,80)  | [10,20)  | 0.003909307189095138  |
| April 2020 | household | [70,80)  | [20,30)  | 0.00808790942444936   |
| April 2020 | household | [70,80)  | [30,40)  | 0.011221697429951017  |
| April 2020 | household | [70,80)  | [40,50)  | 0.00811426572720439   |
| April 2020 | household | [70,80)  | [50,60)  | 0.02401440795832354   |
| April 2020 | household | [70,80)  | [60,70)  | 0.19507147653006224   |
| April 2020 | household | [70,80)  | [70,80)  | 0.6283931567250657    |
| April 2020 | household | [70,80)  | [80,Inf] | 0.102833114207292     |
| April 2020 | household | [80,Inf] | [0,5)    | 0.024715327921392898  |
| April 2020 | household | [80,Inf] | [5,10)   | 0.0013454031315745638 |
| April 2020 | household | [80,Inf] | [10,20)  | 5.763932199329193e-4  |
| April 2020 | household | [80,Inf] | [20,30)  | 5.066813799461733e-4  |
| April 2020 | household | [80,Inf] | [30,40)  | 0.0010451609383005439 |
| April 2020 | household | [80,Inf] | [40,50)  | 0.0027186958425426    |
| April 2020 | household | [80,Inf] | [50,60)  | 0.004875603573032729  |
| April 2020 | household | [80,Inf] | [60,70)  | 0.02974381317748782   |
| April 2020 | household | [80,Inf] | [70,80)  | 0.1959534116359983    |
| April 2020 | household | [80,Inf] | [80,Inf] | 0.39021824450555115   |
| June 2020  | all       | [0,5)    | [0,5)    | 9.535680974897533     |
| June 2020  | all       | [0,5)    | [5,10)   | 2.894582679702587     |
| June 2020  | all       | [0,5)    | [10,20)  | 1.096085602001159     |
| June 2020  | all       | [0,5)    | [20,30)  | 1.4111914326596       |
| June 2020  | all       | [0,5)    | [30,40)  | 2.698977139974758     |
| June 2020  | all       | [0,5)    | [40,50)  | 1.3054750835522104    |
| June 2020  | all       | [0,5)    | [50,60)  | 0.6310028462405055    |
| June 2020  | all       | [0,5)    | [60,70)  | 0.49836716906255313   |
| June 2020  | all       | [0,5)    | [70,80)  | 0.16162444098120982   |
| June 2020  | all       | [0,5)    | [80,Inf] | 0.04205784904241579   |
| June 2020  | all       | [5,10)   | [0,5)    | 2.732347013939343     |
| June 2020  | all       | [5,10)   | [5,10)   | 15.528862822872497    |
| June 2020  | all       | [5,10)   | [10,20)  | 3.159605735522081     |

|           |     |         |          |                      |
|-----------|-----|---------|----------|----------------------|
| June 2020 | all | [5,10)  | [20,30)  | 1.2030425459587817   |
| June 2020 | all | [5,10)  | [30,40)  | 2.035732909205147    |
| June 2020 | all | [5,10)  | [40,50)  | 2.2696717834830213   |
| June 2020 | all | [5,10)  | [50,60)  | 0.9093114947519015   |
| June 2020 | all | [5,10)  | [60,70)  | 0.541291670428993    |
| June 2020 | all | [5,10)  | [70,80)  | 0.18942044691607662  |
| June 2020 | all | [5,10)  | [80,Inf] | 0.055314023756475164 |
| June 2020 | all | [10,20) | [0,5)    | 0.4726642589043966   |
| June 2020 | all | [10,20) | [5,10)   | 1.443385263474447    |
| June 2020 | all | [10,20) | [10,20)  | 7.964256213631935    |
| June 2020 | all | [10,20) | [20,30)  | 1.6151615082436357   |
| June 2020 | all | [10,20) | [30,40)  | 1.197062810261488    |
| June 2020 | all | [10,20) | [40,50)  | 1.852809467071242    |
| June 2020 | all | [10,20) | [50,60)  | 1.1666745111896015   |
| June 2020 | all | [10,20) | [60,70)  | 0.48001511558330545  |
| June 2020 | all | [10,20) | [70,80)  | 0.20982790841318677  |
| June 2020 | all | [10,20) | [80,Inf] | 0.08938818131364801  |
| June 2020 | all | [20,30) | [0,5)    | 0.5551060073638401   |
| June 2020 | all | [20,30) | [5,10)   | 0.5012947475730598   |
| June 2020 | all | [20,30) | [10,20)  | 1.4732527128605506   |
| June 2020 | all | [20,30) | [20,30)  | 3.188285846053175    |
| June 2020 | all | [20,30) | [30,40)  | 1.6199369002308959   |
| June 2020 | all | [20,30) | [40,50)  | 1.3448856447671544   |
| June 2020 | all | [20,30) | [50,60)  | 1.4126696488488917   |
| June 2020 | all | [20,30) | [60,70)  | 0.6096319458853104   |
| June 2020 | all | [20,30) | [70,80)  | 0.23300412362443584  |
| June 2020 | all | [20,30) | [80,Inf] | 0.11007079794936349  |
| June 2020 | all | [30,40) | [0,5)    | 1.1087512596362359   |
| June 2020 | all | [30,40) | [5,10)   | 0.8859086899089883   |
| June 2020 | all | [30,40) | [10,20)  | 1.140363206107038    |
| June 2020 | all | [30,40) | [20,30)  | 1.691841692771972    |

|           |     |         |          |                     |
|-----------|-----|---------|----------|---------------------|
| June 2020 | all | [30,40) | [30,40)  | 2.75150663849892    |
| June 2020 | all | [30,40) | [40,50)  | 1.7003355955076498  |
| June 2020 | all | [30,40) | [50,60)  | 1.268322998281017   |
| June 2020 | all | [30,40) | [60,70)  | 0.7822809081583649  |
| June 2020 | all | [30,40) | [70,80)  | 0.3012291744889573  |
| June 2020 | all | [30,40) | [80,Inf] | 0.15308139703338147 |
| June 2020 | all | [40,50) | [0,5)    | 0.5000330521097623  |
| June 2020 | all | [40,50) | [5,10)   | 0.9209339942108333  |
| June 2020 | all | [40,50) | [10,20)  | 1.645681760492174   |
| June 2020 | all | [40,50) | [20,30)  | 1.3096108254278487  |
| June 2020 | all | [40,50) | [30,40)  | 1.5853603639821383  |
| June 2020 | all | [40,50) | [40,50)  | 2.5923077192173163  |
| June 2020 | all | [40,50) | [50,60)  | 1.3773796300369832  |
| June 2020 | all | [40,50) | [60,70)  | 0.694376674930878   |
| June 2020 | all | [40,50) | [70,80)  | 0.3725680259265217  |
| June 2020 | all | [40,50) | [80,Inf] | 0.17585206637704312 |
| June 2020 | all | [50,60) | [0,5)    | 0.2178708181187665  |
| June 2020 | all | [50,60) | [5,10)   | 0.3325831751572846  |
| June 2020 | all | [50,60) | [10,20)  | 0.9340960678768528  |
| June 2020 | all | [50,60) | [20,30)  | 1.2400088728671457  |
| June 2020 | all | [50,60) | [30,40)  | 1.065988858717057   |
| June 2020 | all | [50,60) | [40,50)  | 1.241607474841456   |
| June 2020 | all | [50,60) | [50,60)  | 1.9099162834389065  |
| June 2020 | all | [50,60) | [60,70)  | 0.7868876413180401  |
| June 2020 | all | [50,60) | [70,80)  | 0.3618812636579212  |
| June 2020 | all | [50,60) | [80,Inf] | 0.2759041618334919  |
| June 2020 | all | [60,70) | [0,5)    | 0.20652214757392387 |
| June 2020 | all | [60,70) | [5,10)   | 0.23762562647210783 |
| June 2020 | all | [60,70) | [10,20)  | 0.461282107282825   |
| June 2020 | all | [60,70) | [20,30)  | 0.6422717955751382  |
| June 2020 | all | [60,70) | [30,40)  | 0.7891403878043921  |

|           |           |          |          |                     |
|-----------|-----------|----------|----------|---------------------|
| June 2020 | all       | [60,70)  | [40,50)  | 0.7512643140495083  |
| June 2020 | all       | [60,70)  | [50,60)  | 0.944472593030437   |
| June 2020 | all       | [60,70)  | [60,70)  | 1.322817791275073   |
| June 2020 | all       | [60,70)  | [70,80)  | 0.49975606347975243 |
| June 2020 | all       | [60,70)  | [80,Inf] | 0.22743473733403602 |
| June 2020 | all       | [70,80)  | [0,5)    | 0.09196213298673543 |
| June 2020 | all       | [70,80)  | [5,10)   | 0.11416904467532751 |
| June 2020 | all       | [70,80)  | [10,20)  | 0.2768469419501834  |
| June 2020 | all       | [70,80)  | [20,30)  | 0.33703762524092934 |
| June 2020 | all       | [70,80)  | [30,40)  | 0.4172106756852329  |
| June 2020 | all       | [70,80)  | [40,50)  | 0.5534424950319953  |
| June 2020 | all       | [70,80)  | [50,60)  | 0.5963616584451491  |
| June 2020 | all       | [70,80)  | [60,70)  | 0.686188421177565   |
| June 2020 | all       | [70,80)  | [70,80)  | 1.053757211029444   |
| June 2020 | all       | [70,80)  | [80,Inf] | 0.30884140507172686 |
| June 2020 | all       | [80,Inf] | [0,5)    | 0.04559929126211945 |
| June 2020 | all       | [80,Inf] | [5,10)   | 0.06352888360302915 |
| June 2020 | all       | [80,Inf] | [10,20)  | 0.22472771076635492 |
| June 2020 | all       | [80,Inf] | [20,30)  | 0.30338073499752505 |
| June 2020 | all       | [80,Inf] | [30,40)  | 0.4039750457344324  |
| June 2020 | all       | [80,Inf] | [40,50)  | 0.49775139149445113 |
| June 2020 | all       | [80,Inf] | [50,60)  | 0.866347494059004   |
| June 2020 | all       | [80,Inf] | [60,70)  | 0.5950196656811426  |
| June 2020 | all       | [80,Inf] | [70,80)  | 0.5885083175636722  |
| June 2020 | all       | [80,Inf] | [80,Inf] | 0.6780733075535321  |
| June 2020 | community | [0,5)    | [0,5)    | 8.775098872842303   |
| June 2020 | community | [0,5)    | [5,10)   | 2.4259702353676738  |
| June 2020 | community | [0,5)    | [10,20)  | 1.1103833392202864  |
| June 2020 | community | [0,5)    | [20,30)  | 1.1538423836197214  |
| June 2020 | community | [0,5)    | [30,40)  | 1.5190759399490503  |
| June 2020 | community | [0,5)    | [40,50)  | 0.951955196484968   |

|           |           |         |          |                     |
|-----------|-----------|---------|----------|---------------------|
| June 2020 | community | [0,5)   | [50,60)  | 0.6249379087649379  |
| June 2020 | community | [0,5)   | [60,70)  | 0.4666778989853839  |
| June 2020 | community | [0,5)   | [70,80)  | 0.14869475437014731 |
| June 2020 | community | [0,5)   | [80,Inf] | 0.03379425288270739 |
| June 2020 | community | [5,10)  | [0,5)    | 2.290001145338284   |
| June 2020 | community | [5,10)  | [5,10)   | 13.552049152764543  |
| June 2020 | community | [5,10)  | [10,20)  | 2.9356077086962933  |
| June 2020 | community | [5,10)  | [20,30)  | 1.1423310980000407  |
| June 2020 | community | [5,10)  | [30,40)  | 1.2885070984745541  |
| June 2020 | community | [5,10)  | [40,50)  | 1.3568846710655844  |
| June 2020 | community | [5,10)  | [50,60)  | 0.7538392112214657  |
| June 2020 | community | [5,10)  | [60,70)  | 0.4908710905316382  |
| June 2020 | community | [5,10)  | [70,80)  | 0.18686255277292846 |
| June 2020 | community | [5,10)  | [80,Inf] | 0.05401180060028314 |
| June 2020 | community | [10,20) | [0,5)    | 0.47883012390150836 |
| June 2020 | community | [10,20) | [5,10)   | 1.3410573634296992  |
| June 2020 | community | [10,20) | [10,20)  | 6.773912647595956   |
| June 2020 | community | [10,20) | [20,30)  | 1.537014201167461   |
| June 2020 | community | [10,20) | [30,40)  | 0.9747800048936158  |
| June 2020 | community | [10,20) | [40,50)  | 1.022910795326035   |
| June 2020 | community | [10,20) | [50,60)  | 0.7384084271672123  |
| June 2020 | community | [10,20) | [60,70)  | 0.426729596102731   |
| June 2020 | community | [10,20) | [70,80)  | 0.21008282515054444 |
| June 2020 | community | [10,20) | [80,Inf] | 0.0878646652867293  |
| June 2020 | community | [20,30) | [0,5)    | 0.45387279023632754 |
| June 2020 | community | [20,30) | [5,10)   | 0.47599607292386387 |
| June 2020 | community | [20,30) | [10,20)  | 1.4019729473041542  |
| June 2020 | community | [20,30) | [20,30)  | 2.5316710137865135  |
| June 2020 | community | [20,30) | [30,40)  | 1.4316037237039811  |
| June 2020 | community | [20,30) | [40,50)  | 1.1217014761080693  |
| June 2020 | community | [20,30) | [50,60)  | 1.0102189739176024  |



|           |           |                  |                     |
|-----------|-----------|------------------|---------------------|
| June 2020 | community | [20,30) [60,70)  | 0.5159904157884702  |
| June 2020 | community | [20,30) [70,80)  | 0.23588225957257405 |
| June 2020 | community | [20,30) [80,Inf] | 0.11108293014612677 |
| June 2020 | community | [30,40) [0,5)    | 0.6240403786736254  |
| June 2020 | community | [30,40) [5,10)   | 0.5607293018946535  |
| June 2020 | community | [30,40) [10,20)  | 0.9286071773281189  |
| June 2020 | community | [30,40) [20,30)  | 1.4951520950374677  |
| June 2020 | community | [30,40) [30,40)  | 2.2311298092518848  |
| June 2020 | community | [30,40) [40,50)  | 1.5319243947719958  |
| June 2020 | community | [30,40) [50,60)  | 1.1771962014747186  |
| June 2020 | community | [30,40) [60,70)  | 0.7120570167812902  |
| June 2020 | community | [30,40) [70,80)  | 0.30426648426527575 |
| June 2020 | community | [30,40) [80,Inf] | 0.15006596144293008 |
| June 2020 | community | [40,50) [0,5)    | 0.3646263017982732  |
| June 2020 | community | [40,50) [5,10)   | 0.5505709222617169  |
| June 2020 | community | [40,50) [10,20)  | 0.9085591853050433  |
| June 2020 | community | [40,50) [20,30)  | 1.0922795965796408  |
| June 2020 | community | [40,50) [30,40)  | 1.428338470494126   |
| June 2020 | community | [40,50) [40,50)  | 2.0961542356708267  |
| June 2020 | community | [40,50) [50,60)  | 1.2482588853473104  |
| June 2020 | community | [40,50) [60,70)  | 0.6716206564958566  |
| June 2020 | community | [40,50) [70,80)  | 0.36804094486789013 |
| June 2020 | community | [40,50) [80,Inf] | 0.17889320036735087 |
| June 2020 | community | [50,60) [0,5)    | 0.2157755360585036  |
| June 2020 | community | [50,60) [5,10)   | 0.27571922499306384 |
| June 2020 | community | [50,60) [10,20)  | 0.5912084956184512  |
| June 2020 | community | [50,60) [20,30)  | 0.8867483185656975  |
| June 2020 | community | [50,60) [30,40)  | 0.9893992050106263  |
| June 2020 | community | [50,60) [40,50)  | 1.1252170152945618  |
| June 2020 | community | [50,60) [50,60)  | 1.3862481174634778  |
| June 2020 | community | [50,60) [60,70)  | 0.6629574060044834  |

|           |           |                  |                     |
|-----------|-----------|------------------|---------------------|
| June 2020 | community | [50,60) [70,80)  | 0.3530105968618785  |
| June 2020 | community | [50,60) [80,Inf] | 0.25740753477751316 |
| June 2020 | community | [60,70) [0,5)    | 0.1933898601910007  |
| June 2020 | community | [60,70) [5,10)   | 0.21549109039089567 |
| June 2020 | community | [60,70) [10,20)  | 0.41007603386055513 |
| June 2020 | community | [60,70) [20,30)  | 0.5436182555117914  |
| June 2020 | community | [60,70) [30,40)  | 0.7183002163729504  |
| June 2020 | community | [60,70) [40,50)  | 0.7266436421942291  |
| June 2020 | community | [60,70) [50,60)  | 0.7957274648405908  |
| June 2020 | community | [60,70) [60,70)  | 0.7985840451853425  |
| June 2020 | community | [60,70) [70,80)  | 0.38084484648204153 |
| June 2020 | community | [60,70) [80,Inf] | 0.20961158013602318 |
| June 2020 | community | [70,80) [0,5)    | 0.0846047255900723  |
| June 2020 | community | [70,80) [5,10)   | 0.1126275038869663  |
| June 2020 | community | [70,80) [10,20)  | 0.27718379452992353 |
| June 2020 | community | [70,80) [20,30)  | 0.3412021585774272  |
| June 2020 | community | [70,80) [30,40)  | 0.42141843199238316 |
| June 2020 | community | [70,80) [40,50)  | 0.5467180734153767  |
| June 2020 | community | [70,80) [50,60)  | 0.5817443599190796  |
| June 2020 | community | [70,80) [60,70)  | 0.5229189505913454  |
| June 2020 | community | [70,80) [70,80)  | 0.5314860041145427  |
| June 2020 | community | [70,80) [80,Inf] | 0.21658469478934658 |
| June 2020 | community | [80,Inf] [0,5)   | 0.0366395209554553  |
| June 2020 | community | [80,Inf] [5,10)  | 0.06203320906088339 |
| June 2020 | community | [80,Inf] [10,20) | 0.22089802053213695 |
| June 2020 | community | [80,Inf] [20,30) | 0.3061711094074914  |
| June 2020 | community | [80,Inf] [30,40) | 0.3960194587411256  |
| June 2020 | community | [80,Inf] [40,50) | 0.5063603581546733  |
| June 2020 | community | [80,Inf] [50,60) | 0.8082681529701518  |
| June 2020 | community | [80,Inf] [60,70) | 0.5483905508804039  |
| June 2020 | community | [80,Inf] [70,80) | 0.41270721302576    |

|           |           |          |          |                       |
|-----------|-----------|----------|----------|-----------------------|
| June 2020 | community | [80,Inf] | [80,Inf] | 0.3375901128630202    |
| June 2020 | household | [0,5)    | [0,5)    | 0.5210517837663807    |
| June 2020 | household | [0,5)    | [5,10)   | 0.47161796656479554   |
| June 2020 | household | [0,5)    | [10,20)  | 0.1129612170885154    |
| June 2020 | household | [0,5)    | [20,30)  | 0.2110650531583942    |
| June 2020 | household | [0,5)    | [30,40)  | 1.40442523338465      |
| June 2020 | household | [0,5)    | [40,50)  | 0.35211564021871034   |
| June 2020 | household | [0,5)    | [50,60)  | 0.040395773902615104  |
| June 2020 | household | [0,5)    | [60,70)  | 0.01838517853482463   |
| June 2020 | household | [0,5)    | [70,80)  | 0.01920090205432248   |
| June 2020 | household | [0,5)    | [80,Inf] | 0.010207703649229514  |
| June 2020 | household | [5,10)   | [0,5)    | 0.44518958587836016   |
| June 2020 | household | [5,10)   | [5,10)   | 0.46955233078719194   |
| June 2020 | household | [5,10)   | [10,20)  | 0.461260651149731     |
| June 2020 | household | [5,10)   | [20,30)  | 0.0518958298687116    |
| June 2020 | household | [5,10)   | [30,40)  | 0.8439388876357736    |
| June 2020 | household | [5,10)   | [40,50)  | 0.9544161861328387    |
| June 2020 | household | [5,10)   | [50,60)  | 0.09034766603430291   |
| June 2020 | household | [5,10)   | [60,70)  | 0.01680190754135318   |
| June 2020 | household | [5,10)   | [70,80)  | 0.0031782837866304726 |
| June 2020 | household | [5,10)   | [80,Inf] | 9.521917498046157e-4  |
| June 2020 | household | [10,20)  | [0,5)    | 0.048712927495235925  |
| June 2020 | household | [10,20)  | [5,10)   | 0.21071106813379206   |
| June 2020 | household | [10,20)  | [10,20)  | 0.9079404680065828    |
| June 2020 | household | [10,20)  | [20,30)  | 0.18368516744792399   |
| June 2020 | household | [10,20)  | [30,40)  | 0.17952547604305386   |
| June 2020 | household | [10,20)  | [40,50)  | 1.078992973800357     |
| June 2020 | household | [10,20)  | [50,60)  | 0.5070614059123068    |
| June 2020 | household | [10,20)  | [60,70)  | 0.03540529645931906   |
| June 2020 | household | [10,20)  | [70,80)  | 0.004266861216366651  |
| June 2020 | household | [10,20)  | [80,Inf] | 4.1207697013029244e-4 |

|           |           |         |          |                      |
|-----------|-----------|---------|----------|----------------------|
| June 2020 | household | [20,30) | [0,5)    | 0.08302731074577999  |
| June 2020 | household | [20,30) | [5,10)   | 0.021624385881006722 |
| June 2020 | household | [20,30) | [10,20)  | 0.16754336505238432  |
| June 2020 | household | [20,30) | [20,30)  | 0.7436410356844917   |
| June 2020 | household | [20,30) | [30,40)  | 0.12702788473097879  |
| June 2020 | household | [20,30) | [40,50)  | 0.09673725222325548  |
| June 2020 | household | [20,30) | [50,60)  | 0.43227893733687317  |
| June 2020 | household | [20,30) | [60,70)  | 0.10280266382733491  |
| June 2020 | household | [20,30) | [70,80)  | 0.004879997797658274 |
| June 2020 | household | [20,30) | [80,Inf] | 1.89706508547085e-4  |
| June 2020 | household | [30,40) | [0,5)    | 0.5769477291098235   |
| June 2020 | household | [30,40) | [5,10)   | 0.36726894515968267  |
| June 2020 | household | [30,40) | [10,20)  | 0.17102521576679017  |
| June 2020 | household | [30,40) | [20,30)  | 0.13266133158992985  |
| June 2020 | household | [30,40) | [30,40)  | 0.5888146667113131   |
| June 2020 | household | [30,40) | [40,50)  | 0.14331295179462222  |
| June 2020 | household | [30,40) | [50,60)  | 0.03436917073417894  |
| June 2020 | household | [30,40) | [60,70)  | 0.03278334699342645  |
| June 2020 | household | [30,40) | [70,80)  | 0.006535719213940716 |
| June 2020 | household | [30,40) | [80,Inf] | 2.799029537185296e-4 |
| June 2020 | household | [40,50) | [0,5)    | 0.1348679810619103   |
| June 2020 | household | [40,50) | [5,10)   | 0.3872513797302199   |
| June 2020 | household | [40,50) | [10,20)  | 0.9583696874909226   |
| June 2020 | household | [40,50) | [20,30)  | 0.09420174172925586  |
| June 2020 | household | [40,50) | [30,40)  | 0.1336188708348136   |
| June 2020 | household | [40,50) | [40,50)  | 0.5594037917328785   |
| June 2020 | household | [40,50) | [50,60)  | 0.1331505637534002   |
| June 2020 | household | [40,50) | [60,70)  | 0.0168214571202433   |
| June 2020 | household | [40,50) | [70,80)  | 0.009169406805725788 |
| June 2020 | household | [40,50) | [80,Inf] | 9.877261879380193e-4 |
| June 2020 | household | [50,60) | [0,5)    | 0.013947731479694091 |

|           |           |                  |                       |
|-----------|-----------|------------------|-----------------------|
| June 2020 | household | [50,60) [5,10)   | 0.03304426671858822   |
| June 2020 | household | [50,60) [10,20)  | 0.405972362719836     |
| June 2020 | household | [50,60) [20,30)  | 0.3794423209791157    |
| June 2020 | household | [50,60) [30,40)  | 0.02888572507899006   |
| June 2020 | household | [50,60) [40,50)  | 0.1200199846023595    |
| June 2020 | household | [50,60) [50,60)  | 0.5689734916991416    |
| June 2020 | household | [50,60) [60,70)  | 0.12410912094062025   |
| June 2020 | household | [50,60) [70,80)  | 0.01352576816704563   |
| June 2020 | household | [50,60) [80,Inf] | 0.004099439958106652  |
| June 2020 | household | [60,70) [0,5)    | 0.007619015192992298  |
| June 2020 | household | [60,70) [5,10)   | 0.007375818474457062  |
| June 2020 | household | [60,70) [10,20)  | 0.0340234003943412    |
| June 2020 | household | [60,70) [20,30)  | 0.10830363349883572   |
| June 2020 | household | [60,70) [30,40)  | 0.033070751727130365  |
| June 2020 | household | [60,70) [40,50)  | 0.018199162736442124  |
| June 2020 | household | [60,70) [50,60)  | 0.1489557513295358    |
| June 2020 | household | [60,70) [60,70)  | 0.5812627518383996    |
| June 2020 | household | [60,70) [70,80)  | 0.12447169887151541   |
| June 2020 | household | [60,70) [80,Inf] | 0.0108029953652614    |
| June 2020 | household | [70,80) [0,5)    | 0.010925404866807157  |
| June 2020 | household | [70,80) [5,10)   | 0.001915695273840959  |
| June 2020 | household | [70,80) [10,20)  | 0.00562998679034384   |
| June 2020 | household | [70,80) [20,30)  | 0.0070590232868419775 |
| June 2020 | household | [70,80) [30,40)  | 0.009052133387088662  |
| June 2020 | household | [70,80) [40,50)  | 0.013621545105182122  |
| June 2020 | household | [70,80) [50,60)  | 0.0222893676317624    |
| June 2020 | household | [70,80) [60,70)  | 0.17090334270844273   |
| June 2020 | household | [70,80) [70,80)  | 0.5640146532863117    |
| June 2020 | household | [70,80) [80,Inf] | 0.08974472980326166   |
| June 2020 | household | [80,Inf] [0,5)   | 0.011067131478208     |
| June 2020 | household | [80,Inf] [5,10)  | 0.0010935890305874636 |

|           |           |                   |                       |
|-----------|-----------|-------------------|-----------------------|
| June 2020 | household | [80,Inf] [10,20)  | 0.0010360070376604401 |
| June 2020 | household | [80,Inf] [20,30)  | 5.228881272695691e-4  |
| June 2020 | household | [80,Inf] [30,40)  | 7.387035450784288e-4  |
| June 2020 | household | [80,Inf] [40,50)  | 0.002795805330291876  |
| June 2020 | household | [80,Inf] [50,60)  | 0.012872684713738354  |
| June 2020 | household | [80,Inf] [60,70)  | 0.02826330604183391   |
| June 2020 | household | [80,Inf] [70,80)  | 0.17101566452288947   |
| June 2020 | household | [80,Inf] [80,Inf] | 0.3589858536773081    |
